# Supplementary material for: High performance of regenerated LiFePO4 from spent cathodes via an in situ coating and heteroatom-doping strategy using amino acids
Source: Royal Society of Chemistry journal article supplement (doi:10.1039/d4ta01098a), 2024-01-01
Supplement: d4ta01098a1.pdf [file d4ta01098a1.pdf]

## **Supplementary Information for**

# **High performance of regenerated $\text{LiFePO}_4$ from spent cathodes via an in situ coating and heteroatom-doping strategy using amino acids**

Junwei Wang<sup>a,b</sup>, Shuaijing Ji<sup>a,b</sup>, Qigao Han<sup>b</sup>, Fengqian Wang<sup>a,b</sup>, Wuxin Sha<sup>b</sup>, Danpeng Cheng<sup>b</sup>, Weixin Zhang<sup>b</sup>, Shun Tang<sup>b\*</sup>, Yuan-Cheng Cao<sup>b</sup>, Shijie Cheng<sup>b</sup>

<sup>a</sup> School of Materials Science and Engineering, Huazhong University of Science and Technology, Wuhan 430074, China

<sup>b</sup> State Key Laboratory of Advanced Electromagnetic Engineering and Technology, School of Electrical and Electronic Engineering, Huazhong University of Science and Technology, Wuhan 430074, China

\*Corresponding author Email: [shuntang@hust.edu.cn](mailto:shuntang@hust.edu.cn) (S. Tang)

## Computational details

All the calculations are performed in the framework of the density functional theory with the projector augmented plane-wave method, as implemented in the Vienna ab initio simulation package<sup>1</sup>. The generalized gradient approximation proposed by Perdew, Burke, and Ernzerhof is selected for the exchange-correlation potential<sup>2</sup>. The cut-off energy for plane wave is set to 400 eV. The energy criterion is set to  $10^{-6}$  eV in iterative solution of the Kohn-Sham equation. A vacuum layer of 15 Å is added perpendicular to the sheet to avoid artificial interaction between periodic images. The Brillouin zone integration is performed using a  $2 \times 2 \times 1$  k-mesh for pyridine-N doped graphene and a  $4 \times 2 \times 1$  k-mesh for  $\text{LiFePO}_4$  (010) model. All the structures are relaxed until the residual forces on the atoms have declined to less than  $0.03$  eV/Å.

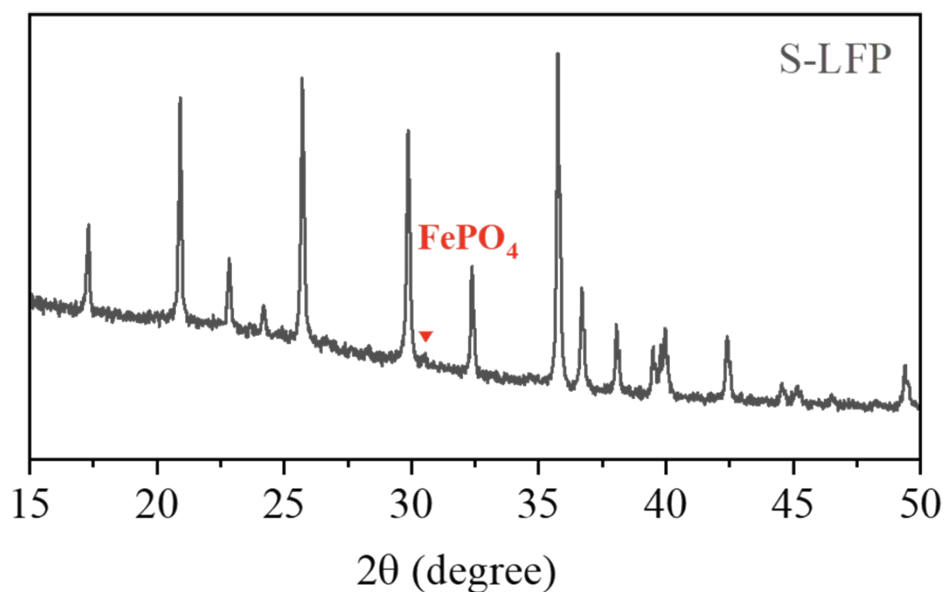

**Supplementary Figure 1.** The XRD pattern of S-LFP.

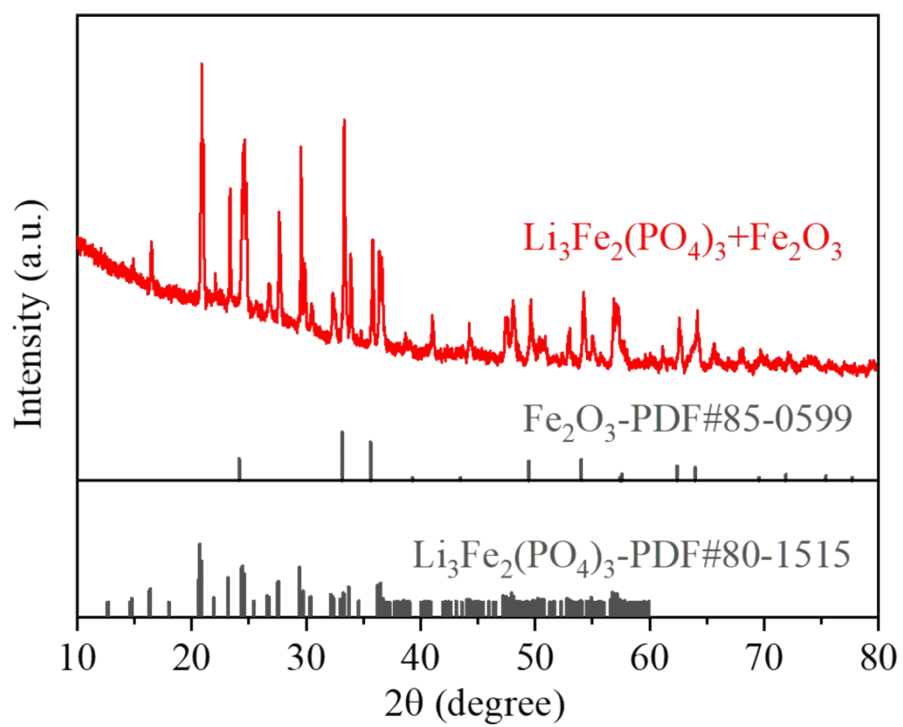

**Supplementary Figure 2.** The XRD pattern of oxidized S-LFP.

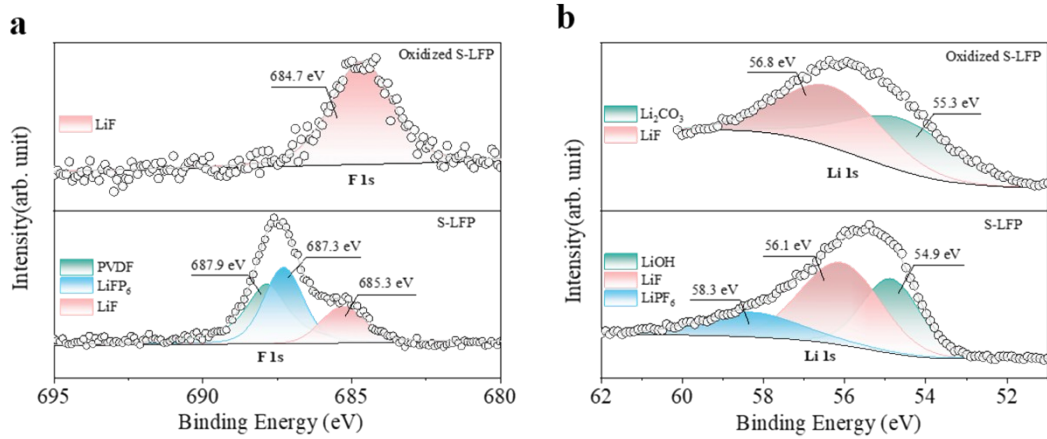

**Supplementary Figure 3.** **a** The F 1s spectrum of S-LFP and oxidized S-LFP. **b** The Li 1s spectrum of S-LFP and oxidized S-LFP.

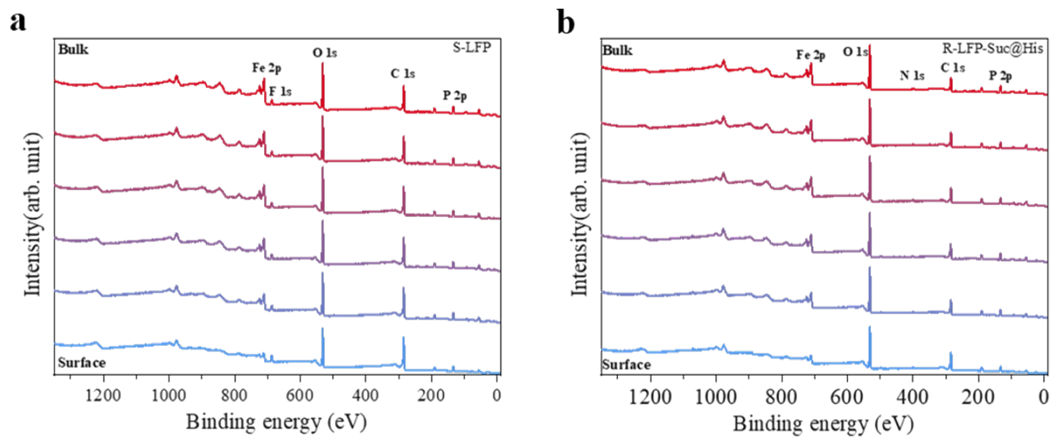

**Supplementary Figure 4.** **a** In-depth XPS survey of S-LFP. **b** In-depth XPS survey of R-LFP-Suc@His.

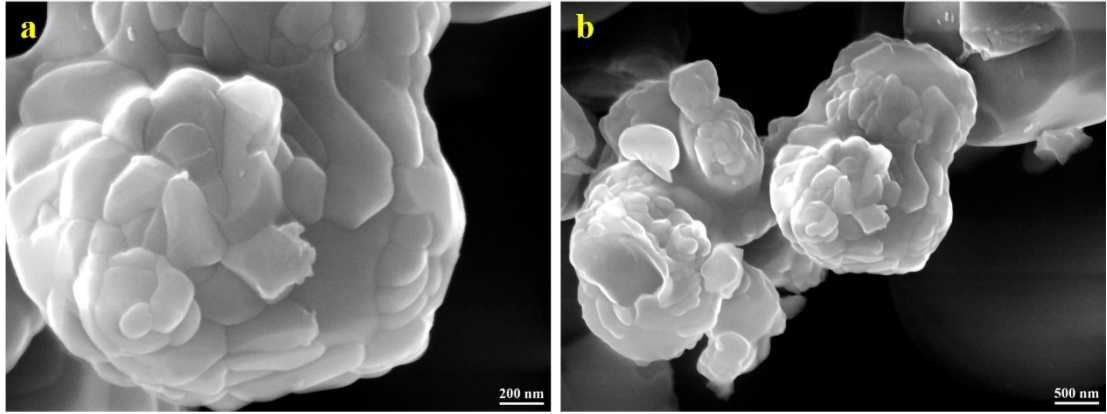

Supplementary Figure 5. a,b SEM images of oxidized S-LFP.

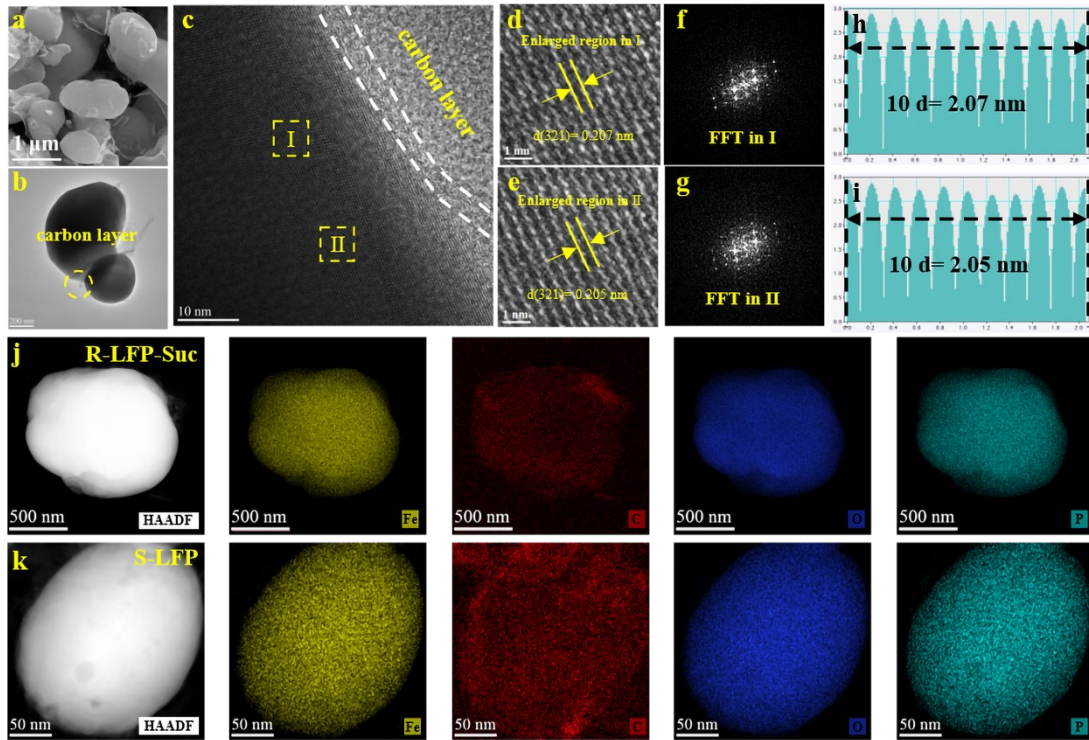

**Supplementary Figure 6.** **a,b** SEM and TEM images of R-LFP-Suc. **c** HRTEM image of R-LFP-Suc. **d,e** Enlarged figures. **f,g** Fast Fourier transform (FFT) images of region I and region II. **h,i** Line profiles in (f) and (g). **j** TEM mapping images for Fe,N,C,O and P in R-LFP-Suc. **k** TEM mapping images for Fe,N,C,O and P in S-LFP.

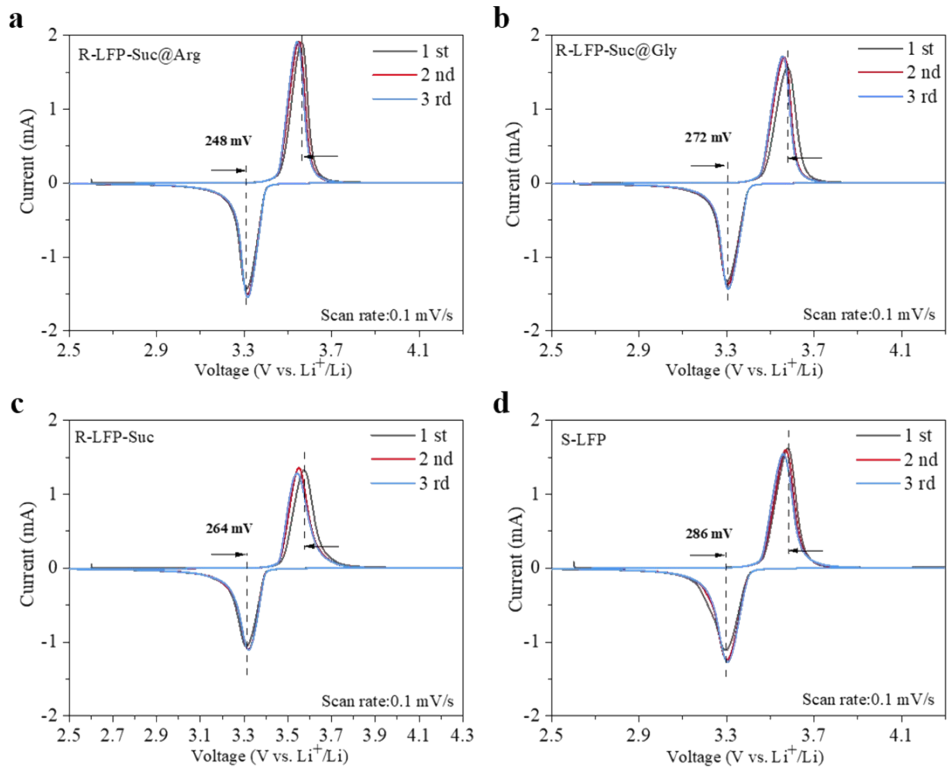

**Supplementary Figure 7.** The first three CV curves. **a** R-LFP-Suc@Arg. **b** R-LFP-Suc@Gly. **c** R-LFP-Suc. **d** S-LFP.

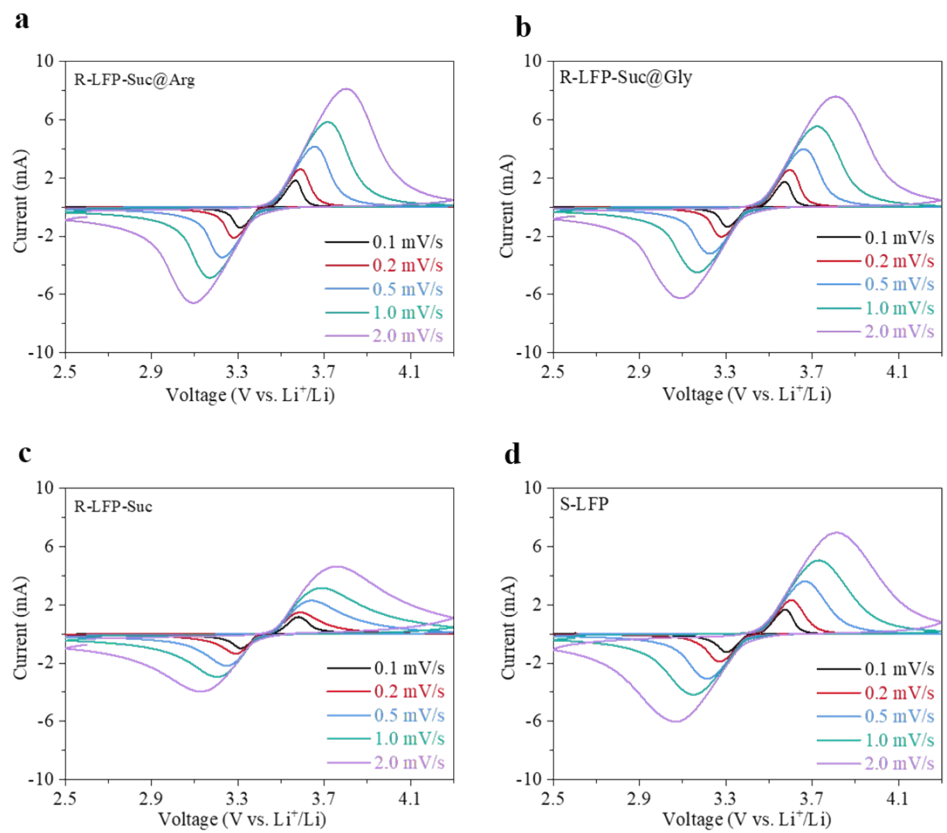

**Supplementary Figure 8.** CV curves of LFP at different scan rates. **a** R-LFP-Suc@Arg. **b** R-LFP-Suc@Gly. **c** R-LFP-Suc. **d** S-LFP.

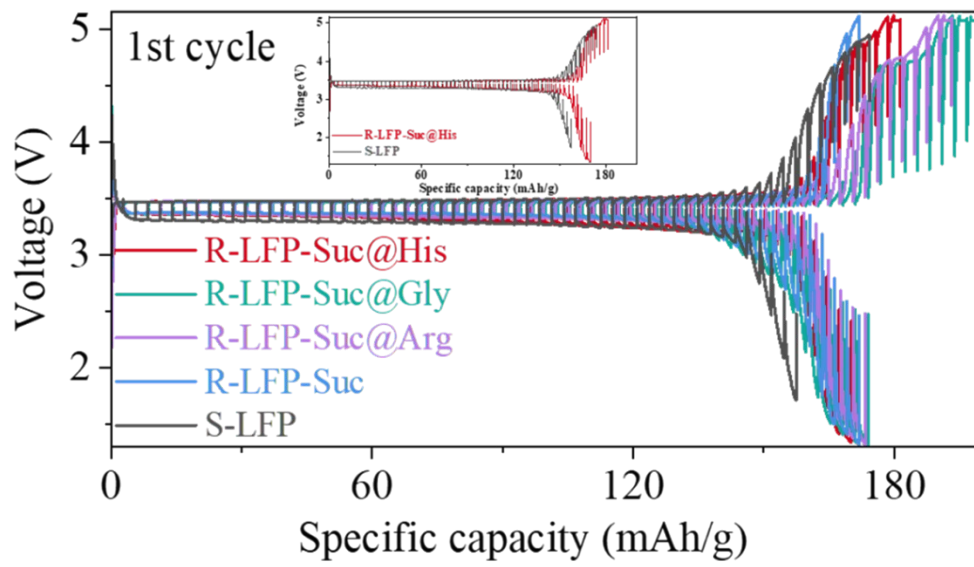

**Supplementary Figure 9.** GITT curves during the first cycle of S-LFP, R-LFP-Suc, R-LFP-Suc@Arg, R-LFP-Suc@Gly and R-LFP-Suc@His.



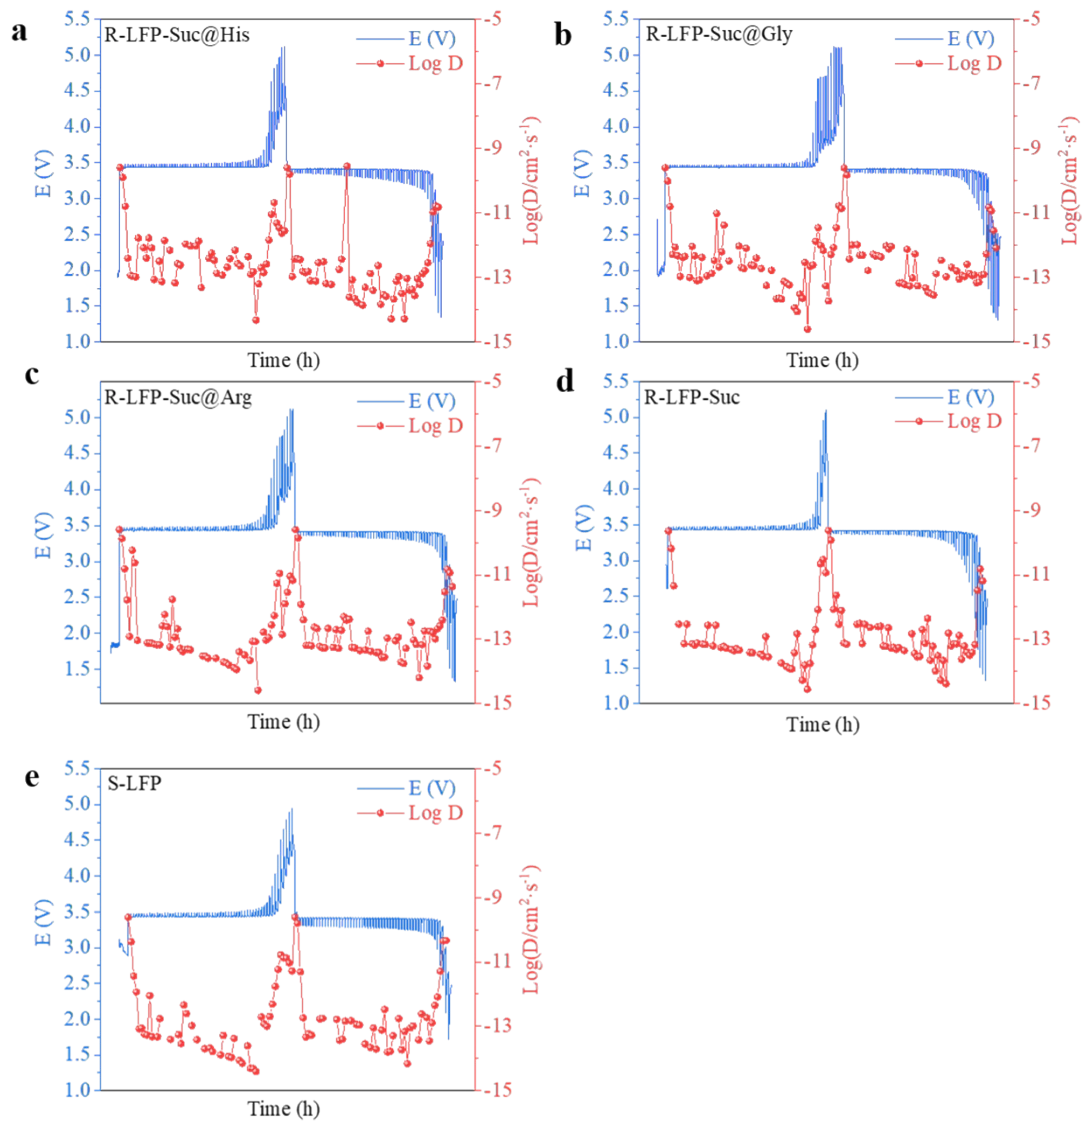

**Supplementary Figure 10.** GITT profiles for the discharge/charge process (blue curves) and diffusion coefficients (red curves) of **a** R-LFP-Suc@His, **b** R-LFP-Suc@Gly, **c** R-LFP-Suc@Arg, **d** R-LFP-Suc, **e** S-LFP.

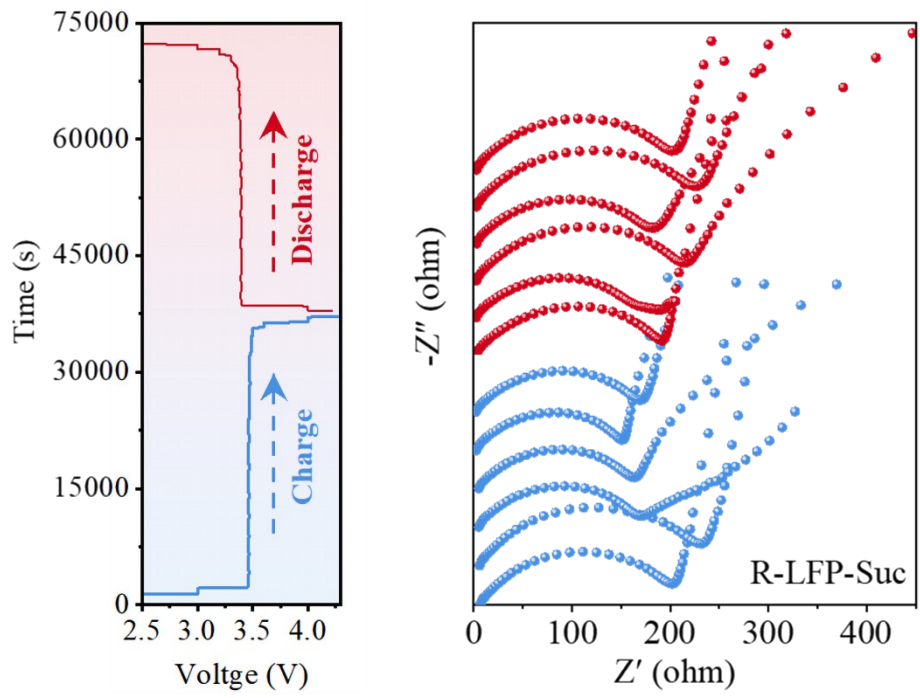

**Supplementary Figure 11.** In situ EIS of R-LFP-Suc during charge/discharge.

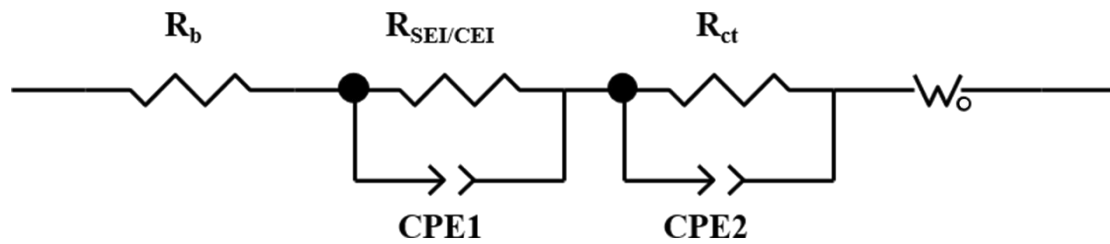

Supplementary Figure 12. Equivalent circuit model used to fit experimental EIS data .

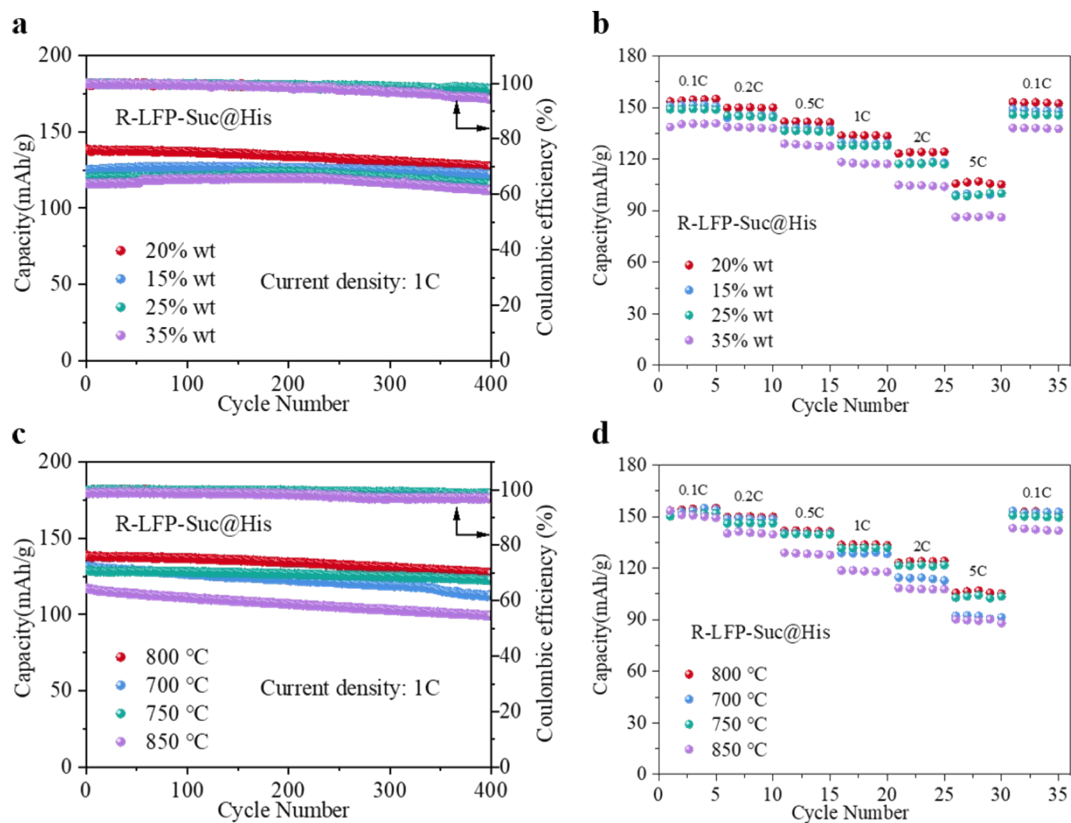

**Supplementary Figure 13.** a,b The cycling performance and rate performance of R-LFP-Suc@His with different sucrose contents. c,d The cycling performance and rate performance of R-LFP-Suc@His at different temperatures.

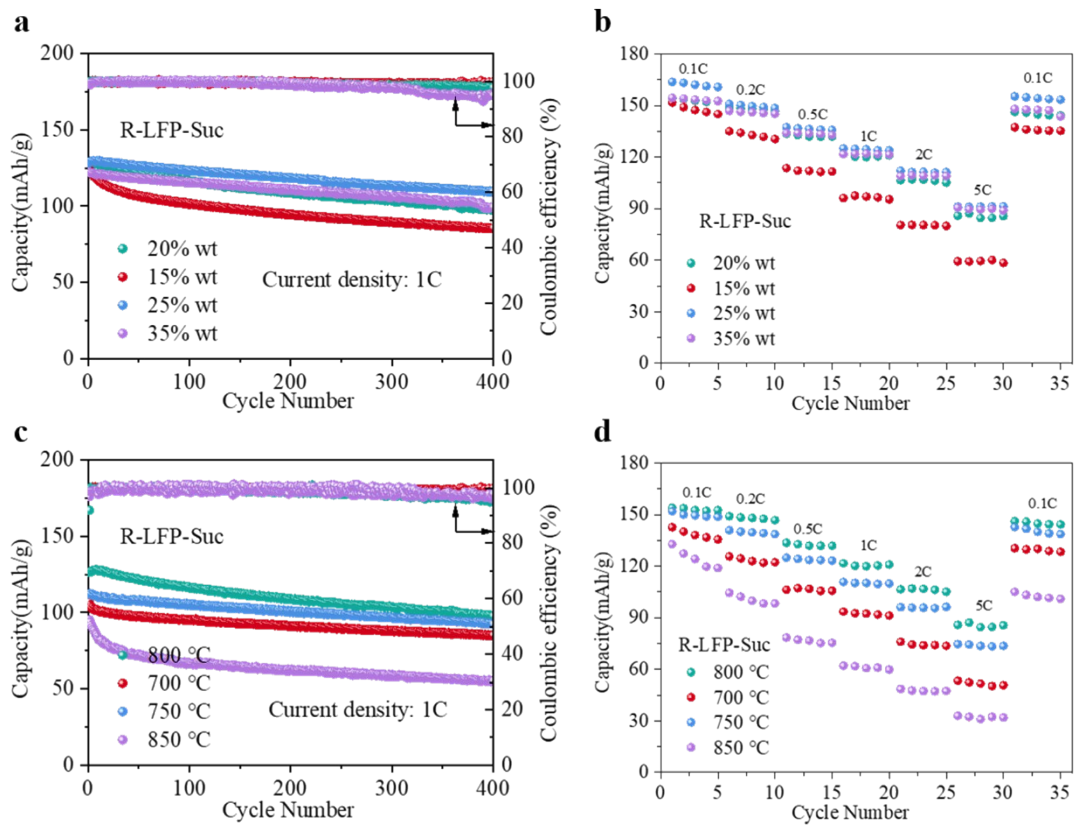

**Supplementary Figure 14.** **a,b** The cycling performance and rate performance of R-LFP-Suc with different sucrose contents. **c,d** The cycling performance and rate performance of R-LFP-Suc at different temperatures.

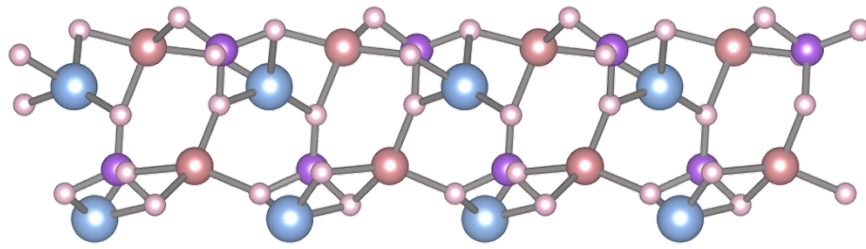

LFP (010)

**Supplementary Figure 15.** The optimized structure model of the LFP.

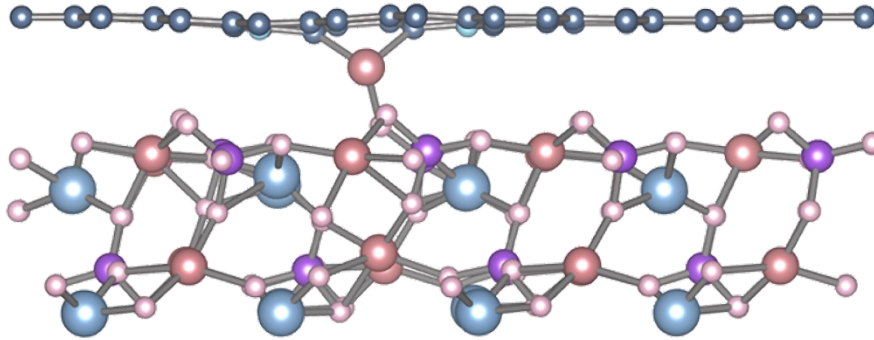

LFP (010)

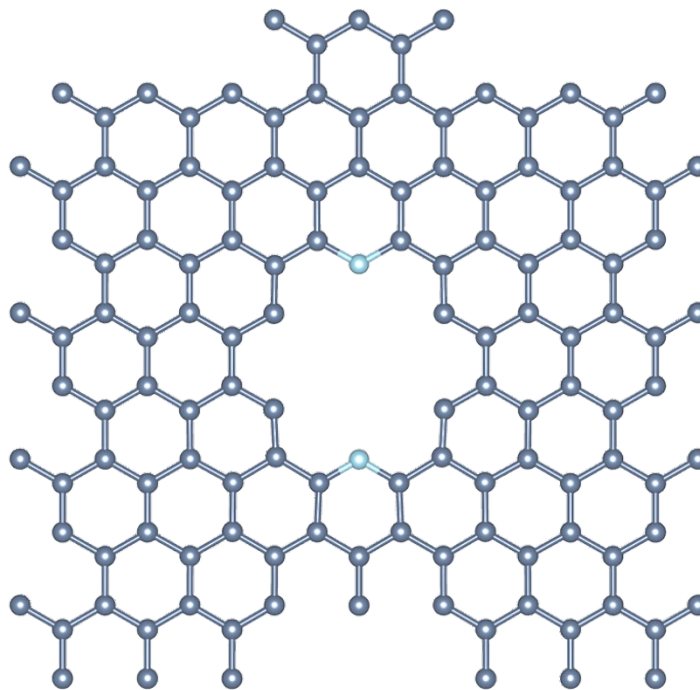

N doped carbon structure

**Supplementary Figure 16.** The optimized structure model of the R-LFP-Suc@His.

**Supplementary Table 1.** ICP-OES analysis of the powder from S-LFP, S-LFP after oxidized, S-LFP after cleaned, R-LFP-Suc@His, R-LFP-Suc@Gly, R-LFP-Suc@Arg, R-LFP-Suc.

| Sample               | Li (mol):Fe (mol):P (mol) | molar ratio |
|----------------------|---------------------------|-------------|
| S-LFP                |                           | 1.33:1:1    |
| S-LFP after oxidized |                           | 1.28:1:1.01 |
| S-LFP after cleaned  |                           | 0.98:1:1.01 |
| R-LFP-Suc@His        |                           | 1.07:1:1    |
| R-LFP-Suc@Gly        |                           | 1.01:1:1.01 |
| R-LFP-Suc@Arg        |                           | 1:1:1       |
| R-LFP-Suc            |                           | 1.02:1:1    |

**Supplementary Table 2.** The carbon content of R-LFP-Suc@His and R-LFP-Suc.

| Sample        | Testing Quality (g) | C (wt%)     |
|---------------|---------------------|-------------|
| R-LFP-Suc@His | 0.1012/0.2052       | 4.474/4.410 |
| R-LFP-Suc     | 0.2070/0.2111       | 2.972/2.970 |

**Supplementary Table 3.** Fitting result of equivalent circuit model for impedance parameters at different state of S-LFP sample. (C-Charge, D-Discharge.)

| <b>Charge/Discharge</b> | <b><math>R_b</math> (<math>\Omega</math>)</b> | <b><math>R_{ct}</math> (<math>\Omega</math>)</b> |
|-------------------------|-----------------------------------------------|--------------------------------------------------|
| C-2.5 V                 | 1.438                                         | 132.2                                            |
| C-3.0 V                 | 1.149                                         | 120.8                                            |
| C-3.5 V                 | 1.11                                          | 82.42                                            |
| C-3.6 V                 | 1.425                                         | 77.56                                            |
| C-4.0 V                 | 1.389                                         | 58.53                                            |
| C-4.3 V                 | 1.416                                         | 54.02                                            |
| D-4.0 V                 | 1.5                                           | 68.61                                            |
| D-3.4 V                 | 1.285                                         | 71.23                                            |
| D-3.3 V                 | 1.371                                         | 69.77                                            |
| D-3.2 V                 | 1.467                                         | 83.02                                            |
| D-3.0 V                 | 1.35                                          | 90.49                                            |
| D-2.5 V                 | 1.394                                         | 118                                              |



**Supplementary Table 4.** Fitting result of equivalent circuit model for impedance parameters at different state of R-LFP-Suc@His sample. (C-Charge, D-Discharge.)

| <b>Charge/Discharge</b> | <b><math>R_b</math> (<math>\Omega</math>)</b> | <b><math>R_{ct}</math> (<math>\Omega</math>)</b> |
|-------------------------|-----------------------------------------------|--------------------------------------------------|
| C-2.5 V                 | 2.796                                         | 311                                              |
| C-3.0 V                 | 2.778                                         | 314.1                                            |
| C-3.5 V                 | 2.73                                          | 61.87                                            |
| C-3.6 V                 | 2.835                                         | 64.63                                            |
| C-4.0 V                 | 2.411                                         | 50.88                                            |
| C-4.3 V                 | 2.509                                         | 51.72                                            |
| D-4.0 V                 | 2.303                                         | 52.16                                            |
| D-3.4 V                 | 2.157                                         | 54.03                                            |
| D-3.3 V                 | 2.013                                         | 48.58                                            |
| D-3.2 V                 | 2.597                                         | 52.95                                            |
| D-3.0 V                 | 2.138                                         | 50.77                                            |
| D-2.5 V                 | 2.243                                         | 55.75                                            |

**Supplementary Table 5.** The electrochemical properties of regenerated LFP samples in previous work and this work.

| Samples                         | Methods                                   | Capacity (mAh/g)     | Capacity retention                                      | Ref.      |
|---------------------------------|-------------------------------------------|----------------------|---------------------------------------------------------|-----------|
| S-650                           | Solid state sintering                     | 147.0 mAh/g at 0.2C  | 95.32% after 100 cycles at 0.2C                         | 3         |
| S-14                            | Full-solid route                          | 140.0 mAh/g at 0.2C  | 101.9% after 100 cycles at 0.2C                         | 4         |
| regenerated LFP                 | Hydrothermal                              | 105.0 mAh/g at 1C    | 98.6% after 200 cycles at 0.2C                          | 5         |
| Regeneration-LFP                | Solid state sintering                     | 129.43 mAh/g at 0.5C | 92.96% after 1000 cycles at 0.5C                        | 6         |
| R-LFP-700                       | Hydrothermal                              | 145.93 mAh/g at 0.2C | 99.1% after 200 cycles at 1C                            | 7         |
| Re-LiFePO <sub>4</sub>          | Fenton reaction and solid state sintering | 140.0 mAh/g at 1C    | 91% after 200 cycles at 1C                              | 8         |
| RA-LFP                          | Hydrothermal                              | 159.0 mAh/g at 0.5C  | 99% after 100 cycles at 0.5C                            | 9         |
| repaired LiFePO <sub>4</sub>    | Solid state sintering                     | 139.0 mAh/g at 0.2C  | 95% after 100 cycles at 0.2C                            | 10        |
| R-LFP-2 h                       | Molten Salt                               | 145.0 mAh/g at 0.5C  | 90% after 100 cycles at 0.5C                            | 11        |
| regenerated LiFePO <sub>4</sub> | embedding-lithium process                 | 135.2 mAh/g at 1C    | 95.3% after 500 cycles at 1C                            | 12        |
| regenerated LFP                 | One-step hydrothermal                     | 140.0 mAh/g at 1C    | 99% after 100 cycles at 1C                              | 13        |
| LFP-500                         | oxidation/reduction proces                | 141.6 mAh/g at 1C    | 92% after 300 cycles at 2C                              | 14        |
| R-LFP-Li <sub>2</sub> DHBN      | Using organic lithium salt                | 140.0 mAh/g at 1C    | 90% after 300 cycles at 1C                              | 15        |
| RSLFP@NC                        | Hydrothermal                              | 139.0 mAh/g at 1C    | 99.5% after 100 cycles and 85.2% after 500 cycles at 1C | 16        |
| R-LFP-Suc@His                   | Redox process                             | 138.8 mAh/g at 1C    | 98.7% after 100 cycles and 87.9% after 500 cycles at 1C | this work |

## References

- G. Kresse and D. Joubert, *Phys. Rev. B*, 1999, **59**, 1758-1775.
- J. P. Perdew, K. Burke and M. Ernzerhof, *Phys. Rev. Lett.*, 1997, **78**, 1396-1396.
- X. Li, J. Zhang, D. Song, J. Song and L. Zhang, *J. Power Sources*, 2017, **345**, 78-84.
- Q. Sun, X. Li, H. Zhang, D. Song, X. Shi, J. Song, C. Li and L. Zhang, *J. Alloys Compd.*, 2020, **818**, 153292.
- Y. Song, B. Xie, S. Song, S. Lei, W. Sun, R. Xu and Y. Yang, *Green Chem.*, 2021, **23**, 3963-3971.
- L. Wang, J. Li, H. Zhou, Z. Huang, S. Tao, B. Zhai, L. Liu and L. Hu, *J. Mater. Sci.: Mater. Electron.*, 2018, **29**, 9283-9290.
- B. Chen, M. Liu, S. Cao, H. Hu, G. Chen, X. Guo and X. Wang, *J. Alloys Compd.*, 2022, **924**, 166487.
- X. Chen, S. Li, Y. Wang, Y. Jiang, X. Tan, W. Han and S. Wang, *Waste Manage.*, 2021, **136**, 67-75.
- P. Xu, Q. Dai, H. Gao, H. Liu, M. Zhang, M. Li, Y. Chen, K. An, Y. S. Meng, P. Liu, Y. Li, J. S. Spangenberg, L. Gaines, J. Lu and Z. Chen, *Joule*, 2020, **4**, 2609-2626.
- Q. Liang, H. Yue, S. Wang, S. Yang, K.-h. Lam and X. Hou, *Electrochim. Acta*, 2020, **330**, 135323.
- X. Liu, M. Wang, L. Deng, Y.-J. Cheng, J. Gao and Y. Xia, *Ind. Eng. Chem. Res.*, 2022, **61**, 3831-3839.
- D. Peng, X. Wang, S. Wang, B. Zhang, X. Lu, W. Hu, J. Zou, P. Li, Y. Wen and J. Zhang, *Green Chem.*, 2022, **24**, 4544-4556.
- Q. Jing, J. Zhang, Y. Liu, W. Zhang, Y. Chen and C. Wang, *ACS Sustain. Chem. Eng.*, 2020, **8**, 17622-17628.
- Z. Zeng, P. Xu, J. Li, C. Yi, W. Zhao, W. Sun, X. Ji, Y. Yang and P. Ge, *Adv. Funct. Mater.*, 2023, DOI: 10.1002/adfm.202308671, 2308671.
- G. Ji, J. Wang, Z. Liang, K. Jia, J. Ma, Z. Zhuang, G. Zhou and H.-M. Cheng, *Nat. Commun.*, 2023, **14**, 584.
- K. Jia, J. Ma, J. Wang, Z. Liang, G. Ji, Z. Piao, R. Gao, Y. Zhu, Z. Zhuang, G. Zhou and H. M. Cheng, *Adv. Mater.*, 2022, **35**, 2208034.
